# Supplementary figures and images for: A photocatalytic superhydrophobic coating with p–n type BiOBr/α-Fe2O3 heterojunctions applied in NO degradation
Source: Royal Society of Chemistry journal article supplement (doi:10.1039/d4ra08085h), 2025-01-01

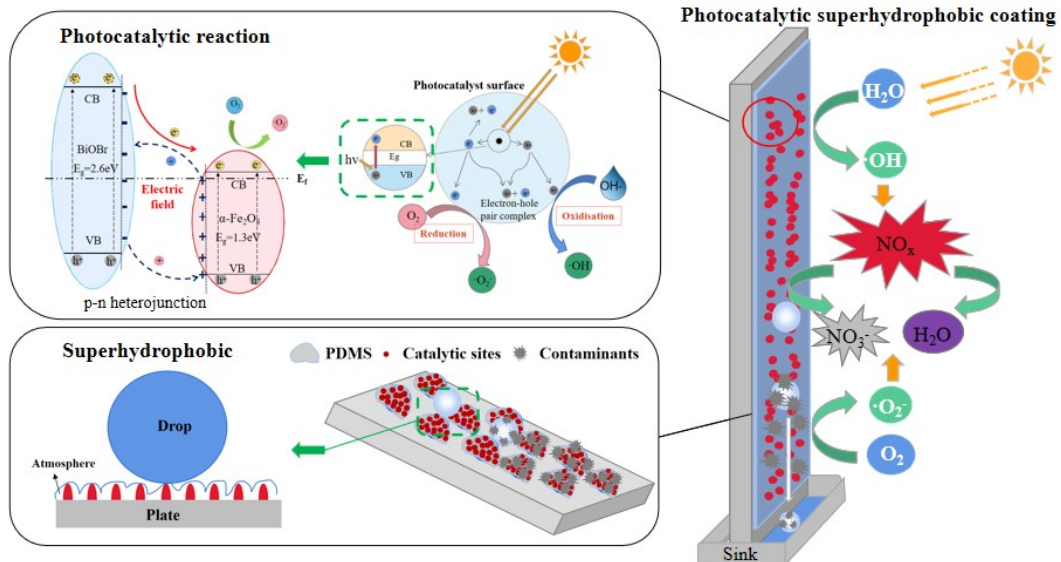

Supplement: d4ra08085h1.pdf [file d4ra08085h1.pdf]
